# Supplementary material for: Opsin evolution and expression in Arthropod compound Eyes and Ocelli: Insights from the cricket Gryllus bimaculatus
Source: PubMed Central journal article supplement (PMC3502269; doi:10.1186/1471-2148-12-163), 2012-08-30
Supplement: 1471-2148-12-163-S1.pdf [file 1471-2148-12-163-S1.pdf]

**Table 1 - Primers used for amplification of *Gryllus bimaculatus* opsins.**

Please note that the degenerate primers include mismatches to the coding sequence.

| Degenerate primers                                                                           |                         | Gene-specific primers |                         |
|----------------------------------------------------------------------------------------------|-------------------------|-----------------------|-------------------------|
| Label                                                                                        | Sequence (5'-3')        | Label                 | Sequence (5'-3')        |
| <i>UV_deg_s1</i>                                                                             | ATWCCNGARCAYTGGC        | <i>UV_s1</i>          | GCGCGGGATGGAGCTC        |
| <i>UV_deg_s2</i>                                                                             | CCGATCTTYATHHTAYAAAYAG  | <i>UV_s2</i>          | AAGCAATCAACAGCAAAAATC   |
| <i>UV_deg_s3</i> ,<br><i>Blue_deg_s3</i> ,<br><i>GreenA_deg_s3</i> ,<br><i>GreenB_deg_s3</i> | GGCCGTTTTYGTNCCNGARGG   | <i>UV_s3</i>          | GGCATATGCTTTCTGTTTTG    |
| <i>UV_deg_as1</i> ,<br><i>Blue_deg_as1</i> ,<br><i>GreenA_deg_as1</i>                        | ACGTTTCATYTTYTTNGCYTG   | <i>UV_as1</i>         | CGAAGAGACTTGGCTGAAC     |
| <i>UV_deg_as2</i> ,<br><i>Blue_deg_as4</i> ,<br><i>GreenB_deg_as3</i>                        | ATCACGCCRTANGGNGTCCA    | <i>UV_as2</i>         | GCTCCTATGCCTGAAATTG     |
| <i>Blue_deg_s1</i>                                                                           | CAAYGGNATCGTCCTNTGGAT   | <i>Blue_s1</i>        | CCCTCGAGACCAGCATAG      |
| <i>Blue_deg_s2</i>                                                                           | CGTACACCNTCNAAYATGTT    | <i>Blue_s2</i>        | ATCAAGATGCTGAACAAAAATC  |
| <i>Blue_deg_s4</i>                                                                           | CAGGCNAARAARATGAAYG     | <i>Blue_s3</i>        | GGTAGCATTCACAATTTTCTTC  |
| <i>Blue_deg_s5</i>                                                                           | ACGCCGTAYGGNGTNATG      | <i>Blue_as1</i>       | CAAGCAAGGCCTGGTTTAC     |
| <i>Blue_deg_as2</i>                                                                          | AGTGAYTTNACRTTCATYTT    | <i>Blue_as2</i>       | CCTACTTCCCAACCAATTG     |
| <i>Blue_deg_as3</i>                                                                          | AGCGTANGGNGTCCANG       | <i>Blue_as3</i>       | CGGATTTCAACAGATTTTTTG   |
| <i>GreenA_deg_s1</i>                                                                         | GTGGCTCNATHHTGGACNATG   | <i>Blue_as4</i>       | ACCGACTTTATTTTCTACAATTG |
| <i>GreenA_deg_s2</i> ,<br><i>GreenB_deg_s2</i>                                               | TGCTAYTAYGARACNTGGG     | <i>GreenA_s1</i>      | CCCCACAGTCAGCCAAAG      |
| <i>GreenA_deg_s4</i>                                                                         | GTCCCTGARGGNAAYATGAC    | <i>GreenA_s2</i>      | CTACTTGCCCCTTTTACG      |
| <i>GreenA_deg_as2</i> ,<br><i>GreenB_deg_as1</i>                                             | AGAGAGGCNACRTTCATYTTYTT | <i>GreenA_s3</i>      | CGAACAGGCAAAGAAAATG     |
| <i>GreenA_deg_as3</i> ,<br><i>GreenB_deg_as2</i>                                             | AACCACAGNGADATNGTCAT    | <i>GreenA_as1</i>     | GCACATCAGTTCTCCTAATACC  |
| <i>GreenB_deg_s1</i>                                                                         | ATGAACCCNCTNTGGCAYGG    | <i>GreenA_as2</i>     | GCTGTCATATTTCTTCTGG     |
|                                                                                              |                         | <i>GreenA_as3</i>     | ACACCGAGTACACCAAAATG    |
|                                                                                              |                         | <i>GreenA_as4</i>     | GTTTCAGGAAAGTACATAAAAAC |
|                                                                                              |                         | <i>GreenB_s1</i>      | GCAGCAGAACCCGAAGTAG     |
|                                                                                              |                         | <i>GreenB_s2</i>      | GCGCCTCTTTCACCATC       |
|                                                                                              |                         | <i>GreenB_s3</i>      | GCGAGCAAGCCAAGAAG       |
|                                                                                              |                         | <i>GreenB_as1</i>     | CCCAGCACCGAGATCAC       |
|                                                                                              |                         | <i>GreenB_as2</i>     | GAAGGCCAAGTTGACTACG     |
|                                                                                              |                         | <i>GreenB_as3</i>     | ATAAATTAGAGAGAGGGTGCTG  |
