# Supplementary material for: Opsin evolution and expression in Arthropod compound Eyes and Ocelli: Insights from the cricket Gryllus bimaculatus
Source: PubMed Central journal article supplement (PMC3502269; doi:10.1186/1471-2148-12-163), 2012-08-30
Supplement: 1471-2148-12-163-S2.pdf [file 1471-2148-12-163-S2.pdf]

**Table 2 - References for data presented in Figures 2 and S1.**

Accession numbers of sequences retrieved from GenBank, references on opsin expression and the wavelength of peak sensitivity ( $\lambda_{\max}$ ) of the respective visual pigment. For opsin sequences of *Acyrtosiphon pisum* (pea aphid) see Additional file 3.

| Scientific name                   | Common name                | Accession numbers                                                                                        | References on gene expression and $\lambda_{\max}$ |
|-----------------------------------|----------------------------|----------------------------------------------------------------------------------------------------------|----------------------------------------------------|
| <i>Vanessa cardui</i>             | painted lady               | VanG: AY613986<br>VanB: AY613987<br>VanUV: AF414074                                                      | [1]                                                |
| <i>Drosophila melanogaster</i>    | fruit fly                  | Rh1: K02315<br>Rh2: M12896<br>Rh3: M17718<br>Rh4: M17730<br>Rh5: U67905<br>Rh6: Z86118<br>Rh7: NM_079311 | [2-15]                                             |
| <i>Apis mellifera</i>             | honey bee                  | AmLop1: U26026<br>AmLop2: BK005515<br>AmBLop: AF004168<br>AmUVop: AF004169<br>Pteropsin: BK005510        | [16-21]                                            |
| <i>Tribolium castaneum</i>        | red flour beetle           | Green: NM_001162519<br>UV: XM_965251                                                                     | [22]                                               |
| <i>Megoura viciae</i>             | vetch aphid                | LW: AF189714<br>UV_A: AF1897145                                                                          | [23]                                               |
| <i>Schistocerca gregaria</i>      | desert locust              | Lo1: X80071<br>Lo2: X80072                                                                               | [24]                                               |
| <i>Gryllus bimaculatus</i>        | two-spotted cricket        | GreenA: HM363620<br>GreenB: HM363621<br>Blue: HM363622<br>UV: HM363623                                   | [25] and this manuscript                           |
| <i>Dianemobius nigrofasciatus</i> | band-legged ground cricket | LWop: FJ232921<br>BLop: AB291232<br>UVop: AB458852                                                       |                                                    |
| <i>Sphodromantis spec.</i>        | praying mantis             | Opsin: X71665                                                                                            |                                                    |
| <i>Triops granarius</i>           | tadpole shrimp             | RhA: AB293428<br>RhB: AB293429<br>RhC: AB293430<br>RhD: AB293431<br>RhE: AB293432                        |                                                    |
| <i>Hasarius adansoni</i>          | Adanson's house jumper     | Rh1: AB251846<br>Rh2: AB251847<br>Rh3: AB251848                                                          |                                                    |
| <i>Limulus polyphemus</i>         | horseshoe crab             | Opsin1: L03781<br>Opsin2: L03782<br>Opsin5: FJ791252                                                     | [26-30]                                            |
| <i>Euprymna scolopes</i>          | Hawaiian bobtail squid     | Eye opsin: EU34773                                                                                       |                                                    |
| <i>Danio rerio</i>                | zebrafish                  | MelanopsinA:<br>NM_001128761                                                                             |                                                    |

1. Briscoe A, Bernard G, Szeto A, Nagy L, White R: **Not all butterfly eyes are created equal: Rhodopsin absorption spectra, molecular identification, and localization of ultraviolet-, blue-, and green-sensitive rhodopsin-encoding mRNAs in the retina of *Vanessa cardui*.** *J Comp Neurol* 2003, **458**:334-349.
2. Bernard GD, Stavenga DG: **Spectral sensitivities of retinular cells measured in intact, living flies by an optical method.** *J Comp Physiol A* 1979, **143**:95-107.
3. Fryxell KJ, Meyerowitz EM: **An opsin gene that is expressed only in the R7 photoreceptor cell of *Drosophila*.** *EMBO J* 1987, **6**:443-451.
4. Montell C, Jones K, Zuker C, Rubin G: **A second opsin gene expressed in the ultraviolet-sensitive R7 photoreceptor cells of *Drosophila melanogaster*.** *J Neurosci* 1987, **7**:1558-1566.
5. Zuker CS, Montell C, Jones K, Laverty T, Rubin GM: **A rhodopsin gene expressed in photoreceptor cell R7 of the *Drosophila* eye: homologies with other signal-transducing molecules.** *J Neurosci* 1987, **7**:1550-1557.
6. Feiler R, Harris WA, Kirschfeld K, Wehrhahn C, Zuker CS: **Targeted misexpression of a *Drosophila* opsin gene leads to altered visual function.** *Nature* 1988, **333**:737-741.
7. Pollock JA, Benzer S: **Transcript localization of four opsin genes in the three visual organs of *Drosophila*; RH2 is ocellus specific.** *Nature* 1988, **333**:779-782.
8. Fortini ME, Rubin GM: **Analysis of cis-acting requirements of the Rh3 and Rh4 genes reveals a bipartite organization to rhodopsin promoters in *Drosophila melanogaster*.** *Genes Dev* 1990, **4**:444-463.
9. Feiler R, Bjornson R, Kirschfeld K, Mismar D, Rubin GM, Smith DP, Socolich M, Zuker CS: **Ectopic expression of ultraviolet-rhodopsins in the blue photoreceptor cells of *Drosophila*: visual physiology and photochemistry of transgenic animals.** *J Neurosci* 1992, **12**:3862-3868.
10. Chou WH, Hall KJ, Wilson DB, Wideman CL, Townson SM, Chadwell LV, Britt SG: **Identification of a novel *Drosophila* opsin reveals specific patterning of the R7 and R8 photoreceptor cells.** *Neuron* 1996, **17**:1101-1115.
11. Huber A, Schulz S, Bentrop J, Groell C, Wolfrum U, Paulsen R: **Molecular cloning of *Drosophila* Rh6 rhodopsin: the visual pigment of a subset of R8 photoreceptor cells.** *FEBS Lett* 1997, **406**:6-10.
12. Papatsenko D, Sheng G, Desplan C: **A new rhodopsin in R8 photoreceptors of *Drosophila*: evidence for coordinate expression with Rh3 in R7 cells.** *Development* 1997, **124**:1665-1673.
13. Salcedo E, Huber A, Henrich S, Chadwell LV, Chou WH, Paulsen R, Britt SG: **Blue- and green-absorbing visual pigments of *Drosophila*: ectopic expression and physiological characterization of the R8 photoreceptor cell-specific Rh5 and Rh6 rhodopsins.** *J Neurosci* 1999, **19**:10716-10726.
14. Mazzoni EO, Celik A, Wernet MF, Vasiliauskas D, Johnston RJ, Cook TA, Pichaud F, Desplan C: **Iroquois complex genes induce co-expression of rhodopsins in *Drosophila*.** *PLoS Biol* 2008, **6**:e97.
15. Hu KG, Reichert H, Stark WS: **Electrophysiological characterization of *Drosophila* ocelli.** *J Comp Physiol* 1978, **126**:15-24.
16. Goldsmith TH, Ruck PR: **The spectral sensitivities of the dorsal ocelli of cockroaches and honeybees; an electrophysiological study.** *J Gen Physiol* 1958, **41**:1171-1185.

17. Menzel R, Blakers M: **Colour receptors in the bee eye - morphology and spectral sensitivity.** *J Comp Physiol A* 1976, **108**:11-33.
18. Peitsch D, Fietz A, Hertel H, de Souza J, Ventura DF, Menzel R: **The spectral input systems of hymenopteran insects and their receptor-based colour vision.** *J Comp Physiol A* 1992, **170**:23-40.
19. Townson SM, Chang BS, Salcedo E, Chadwell LV, Pierce NE, Britt SG: **Honeybee blue- and ultraviolet-sensitive opsins: cloning, heterologous expression in *Drosophila*, and physiological characterization.** *J Neurosci* 1998, **18**:2412-2422.
20. Wakakuwa M, Kurasawa M, Giurfa M, Arikawa K: **Spectral heterogeneity of honeybee ommatidia.** *Naturwissenschaften* 2005, **92**:464-467.
21. Velarde RA, Sauer CD, Walden KKO, Fahrbach SE, Robertson HM: **Pteropsin: A vertebrate-like non-visual opsin expressed in the honey bee brain.** *Insect Biochem Mol Biol* 2005, **35**:1367-1377.
22. Jackowska M, Bao R, Liu Z, McDonald EC, Cook TA, Friedrich M: **Genomic and gene regulatory signatures of cryptozoic adaptation: Loss of blue sensitive photoreceptors through expansion of long wavelength-opsin expression in the red flour beetle *Tribolium castaneum*.** *Front Zool* 2007, **4**:24.
23. Gao N, Foster R, Hardie J: **Two opsin genes from the vetch aphid, *Megoura viciae*.** *Insect Mol Biol* 2000, **9**:197-202.
24. Eggers A, Gewecke M: **The dorsal rim area of the compound eye and polarization vision in the desert locust (*Schistocerca gregaria*).** In *Sensory Systems of Arthropods*. Edited by Wiese K, Gribakin FG, Popov AV, Renninger G. Basel: Birkhäuser Verlag; 1993: 101-109
25. Zufall F, Schmitt M, Menzel R: **Spectral and polarized-light sensitivity of photoreceptors in the compound eye of the cricket (*Gryllus bimaculatus*).** *J Comp Physiol A* 1989, **164**:597-608.
26. Chapman RM, Lall AB: **Electroretinogram characteristics and the spectral mechanisms of the median ocellus and the lateral eye in *Limulus polyphemus*.** *J Gen Physiol* 1967, **50**:2267-2287.
27. Lall AB: **Spectral sensitivity of intracellular responses from visual cells in median ocellus of *Limulus polyphemus*.** *Vision Res* 1970, **10**:905-909.
28. Smith WC, Price DA, Greenberg RM, Battelle BA: **Opsins from the lateral eyes and ocelli of the horseshoe crab, *Limulus polyphemus*.** *Proc Natl Acad Sci USA* 1993, **90**:6150-6154.
29. Dalal JS, Jinks RN, Cacciatore C, Greenberg RM, Battelle BA: ***Limulus* opsins: Diurnal regulation of expression.** *Vis Neurosci* 2003, **20**:523-534.
30. Katti C, Kempler K, Porter ML, Legg A, Gonzalez R, Garcia-Rivera E, Dugger D, Battelle BA: **Opsin co-expression in *Limulus* photoreceptors: differential regulation by light and a circadian clock.** *J Exp Biol* 2010, **213**:2589-2601.
