# Supplementary material for: Opsin evolution and expression in Arthropod compound Eyes and Ocelli: Insights from the cricket Gryllus bimaculatus
Source: PubMed Central journal article supplement (PMC3502269; doi:10.1186/1471-2148-12-163), 2012-08-30
Supplement: 1471-2148-12-163-S4.pdf [file 1471-2148-12-163-S4.pdf]

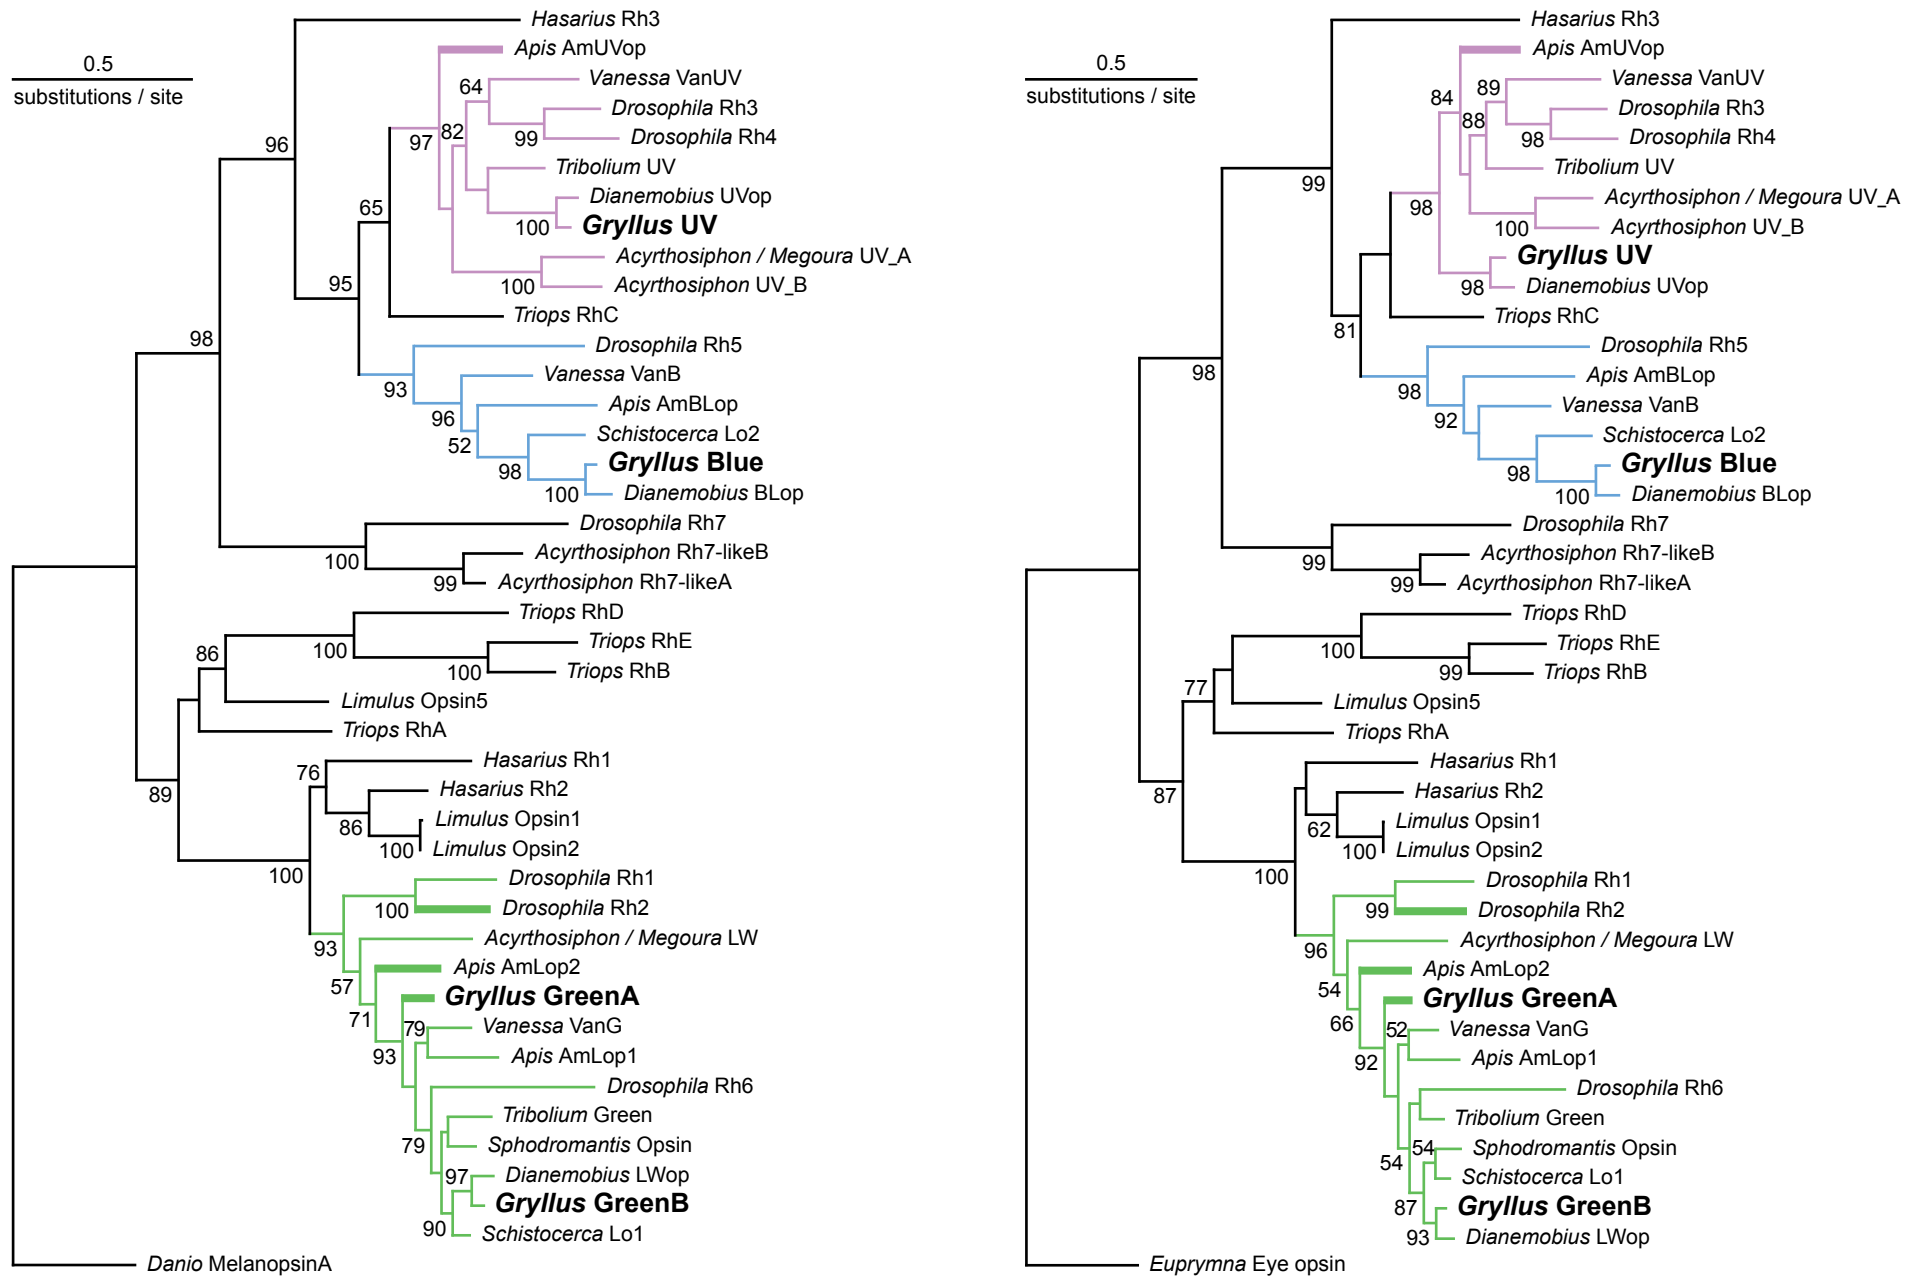

**Figure S1 - Alternative phylogenetic trees of insect visual opsins reconstructed by the Maximum likelihood approach.** As in Fig. 2 but with zebrafish (*Danio rerio*) melanopsin and Hawaiian bobtail squid (*Euprymna scolopes*) eye opsin as outgroups.
